# Supplementary material for: Missense mutations near the N-glycosylation site of the A2 domain lead to various intracellular trafficking defects in coagulation factor VIII
Source: PubMed Central journal article supplement (PMC5361195; doi:10.1038/srep45033), 2017-03-22
Supplement: srep45033-s1.pdf [file srep45033-s1.pdf]

Missense mutations near the N-glycosylation site of the A2 domain lead to various intracellular trafficking defects in coagulation factor VIII

Wei Wei<sup>1,2</sup>, Chunlei Zheng<sup>1</sup>, Min Zhu<sup>3</sup>, Xiaofan Zhu<sup>2</sup>, Renchi Yang<sup>2</sup>, Saurav Misra<sup>4</sup>, Bin Zhang<sup>1</sup>

<sup>1</sup>Genomic Medicine Institute, Cleveland Clinic Lerner Research Institute, Cleveland, OH

<sup>2</sup>State Key Laboratory of Experimental Hematology, Institute of Hematology and Blood Diseases Hospital, Chinese Academy of Medical Sciences & Peking Union Medical College, Tianjin, China

<sup>3</sup>Department of Pathology, Karamay Central Hospital, Karamay, Xinjiang, China

<sup>4</sup>Department of Biochemistry and Molecular Biophysics, Kansas State University, Manhattan, KS

¶Corresponding authors:

Genomic Medicine Institute  
Cleveland Clinic Lerner Research Institute  
9500 Euclid Ave/NE50  
Cleveland, OH 44195  
Email: zhangb@ccf.org  
Phone: 216-444-0884  
Fax: 216-636-0009

Running title: Missense mutations in A2 domain of FVIII

Table S1. Mutagenesis primers used in the study

| <b>Mutation<br/>(codon change)</b>  |           | <b>Primer sequence</b>                      |
|-------------------------------------|-----------|---------------------------------------------|
| D580H<br>(GAT>CAT)                  | Sense     | cagcttcggttctcatgaaatacagaaaacaggatgacattcc |
|                                     | Antisense | ggaatgtcatcctgttttctgtatttcatgagaaccgaagctg |
| D580V<br>(GAT>GTT)                  | Sense     | taccagcttcggttctcaacaatacagaaaacaggatg      |
|                                     | Antisense | catcctgttttctgtatttgttgagaaccgaagctggta     |
| E581K<br>(GAG>AAG)                  | Sense     | ccagcttcggttcttatacaatacagaaaacaggatgaca    |
|                                     | Antisense | tgtcatcctgttttctgtatttataagaaccgaagctgg     |
| E581Q<br>(GAG>CAG)                  | Sense     | ccagcttcggttctgatcaatacagaaaacaggatgaca     |
|                                     | Antisense | tgtcatcctgttttctgtatttgatcagaaccgaagctgg    |
| E581D<br>(GAG>GAT)                  | Sense     | aggtagcagcttcggttctcatcaatacagaaaacagg      |
|                                     | Antisense | cctgttttctgtatttgatgataaccgaagctggtacct     |
| N582H<br>(AAC>CAC)                  | Sense     | tgaggtagcagcttcggttctcatcaatacagaaaac       |
|                                     | Antisense | gttttctgtatttgatgagcaccgaagctggtacctca      |
| N582D<br>(AAC>GAC)                  | Sense     | tgaggtagcagcttcggttctcatcaatacagaaaac       |
|                                     | Antisense | gttttctgtatttgatgaggaccgaagctggtacctca      |
| N582K<br>(AAC>AAG)                  | Sense     | gaggtagcagcttcggttctcatcaatacagaaaac        |
|                                     | Antisense | gttttctgtatttgatgagaagcgaagctggtacctc       |
| R583G<br>(CGA>GGA)                  | Sense     | tgtgaggtagcagcttcggttctcatcaatacag          |
|                                     | Antisense | ctgtatttgatgagaacggaagctggtacctcaca         |
| S584R<br>(AGC>GGC)                  | Sense     | ttctctgtgaggtagcagcttcggttctcatcaaaa        |
|                                     | Antisense | tttgatgagaaccgaaggtggtacctcacagagaa         |
| S584C<br>(AGC>TGC)                  | Sense     | gtgaggtagcagcttcggttctcatcaatacagaaaa       |
|                                     | Antisense | ttttctgtatttgatgagaaccgatgctggtacctcac      |
| S584T<br>(AGC>ACC)                  | Sense     | tctgtgaggtagcaggttcggttctcatcaatac          |
|                                     | Antisense | gtatttgatgagaaccgaacctggtacctcacaga         |
| S584I<br>(AGC>ATC)                  | Sense     | ctctgtgaggtagcagattcgggttctcatcaatacag      |
|                                     | Antisense | ctgtatttgatgagaaccgaatctggtacctcacagag      |
| S584G<br>(AGC>AGG)                  | Sense     | gtgaggtagcagcctcgggttctcatcaatacagaaaa      |
|                                     | Antisense | ttttctgtatttgatgagaaccgaggctggtacctcac      |
| W585R<br>(TGG>CGG)                  | Sense     | ttgatgagaaccgaagccggtacctcacagagaat         |
|                                     | Antisense | aactactcttggttcggccatggagtgtctctta          |
| W585C<br>(TGG>TTG)                  | Sense     | gatgagaaccgaagctgctacctcacagagaatat         |
|                                     | Antisense | ctactcttggttcgacgatggagtgtctcttata          |
| W585L<br>(TGG>TGC)                  | Sense     | atttgatgagaaccgaagctgtacctcacagagaatatac    |
|                                     | Antisense | taaactactcttggttcgaacatggagtgtctcttatatg    |
| D580H (GAT>CAT)<br>+N582D (AAC>GAC) | Sense     | gttttctgtatttcatgaggaccgaagctggtacctca      |
|                                     | Antisense | tgaggtagcagcttcggttctcatgaaatacagaaaac      |
| S584T (AGC>ACC)<br>+N582D (AAC>GAC) | Sense     | gttttctgtatttgatgaggaccgaacctggtacctca      |
|                                     | Antisense | tgaggtagcaggttcggttctcatcaatacagaaaac       |
| I566T<br>(ATA>ACA)                  | Sense     | cattcctctgtctgacattgtctggttctctttgatct      |
|                                     | Antisense | agatcaagaggaaaccagacaatgtcagacaagaggaatg    |

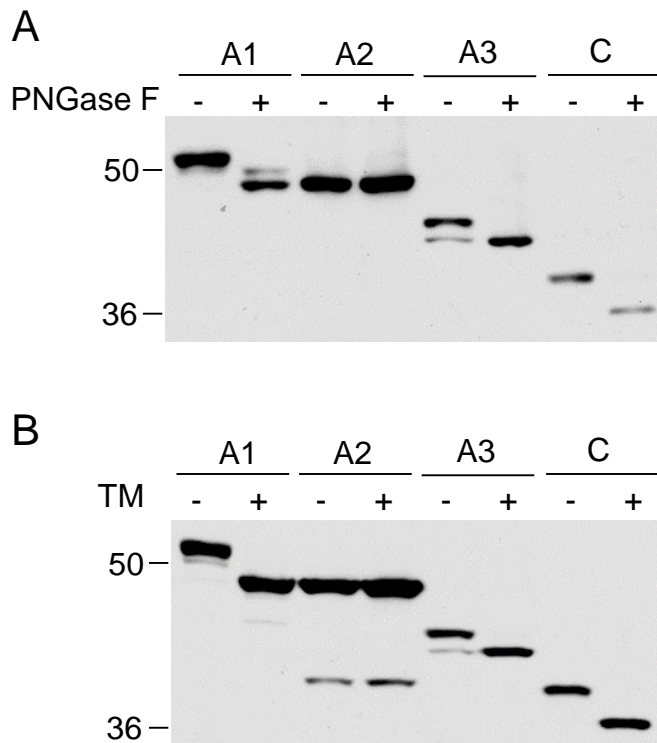

**Figure S1. Glycosylation status of isolated FVIII domains expressed in HEK293T cells.** (A) HEK293T cells were transfected with constructs that express Flag-tagged individual domains (A1, A2, A3 and C) of FVIII. Cell lysates were treated with or without PNGase F digestion, and subject to immunoblotting with an anti-Flag antibody. (B) HEK293T cells were transfected with individual FVIII domain constructs in duplicates. One set of transfected cells were treated with 2  $\mu$ g/ml tunicamycin for 12 h before lysis.

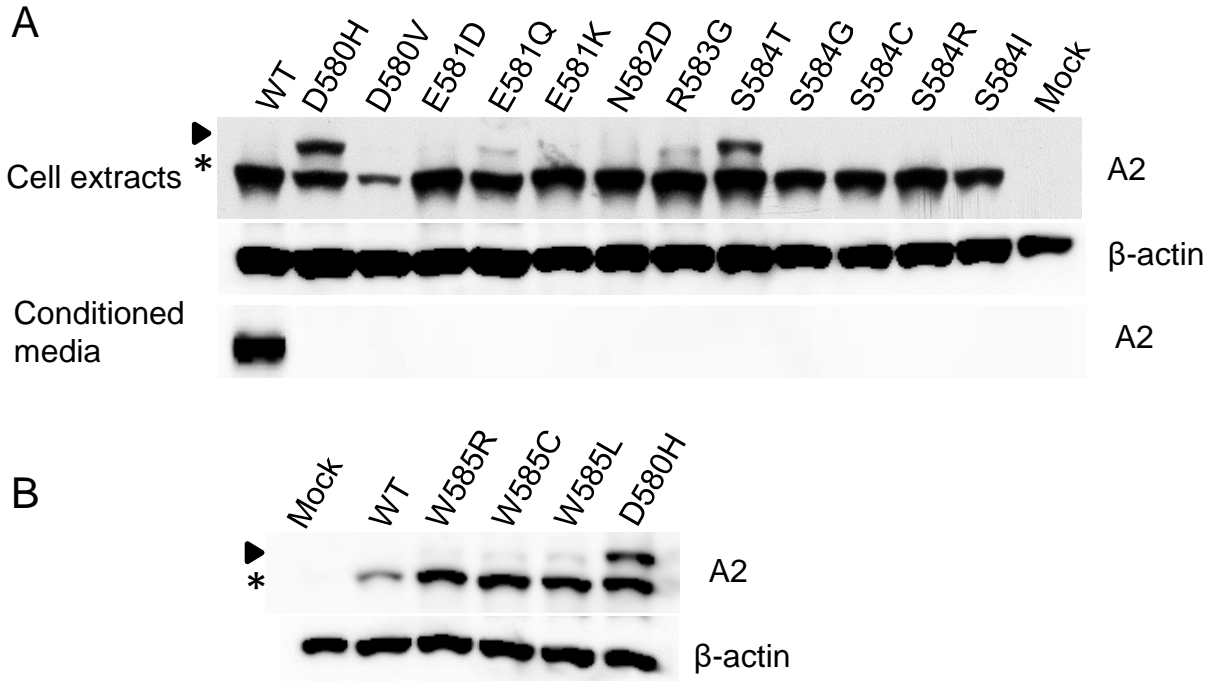

**Figure S2. Glycosylation status of the A2 domain with missense mutations adjacent to N601 (D599 to S604) expressed in HEK293T cells.** (A) Extracts of HEK293T cells transiently transfected with constructs expressing WT A2 and the indicated A2 mutants were collected at 36 h after transfection and analyzed by 10% SDS-PAGE and immunoblotting. Arrowhead indicates glycosylated A2 domain and asterisk indicates non-glycosylated A2 domain. Protein levels in the media were detected by immunoprecipitation with an anti-Flag antibody followed by immunoblotting. (B) Extracts of HEK293T cells transiently transfected with constructs expressing WT A2 and the indicated A2 mutants were collected at 36 h after transfection and analyzed by 10% SDS-PAGE and immunoblotting. Arrowhead denotes N-glycosylated species and asterisk denotes non-glycosylated species of the A2 domain. Representative images of two independent experiments are shown.

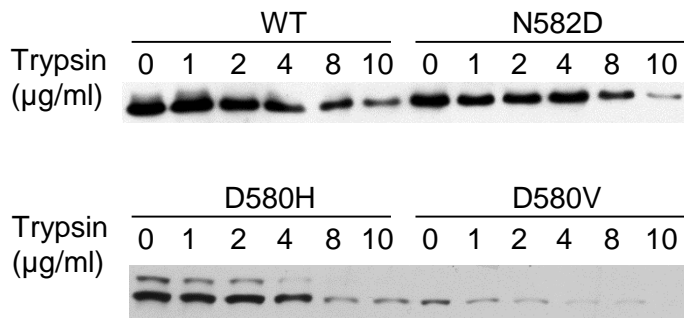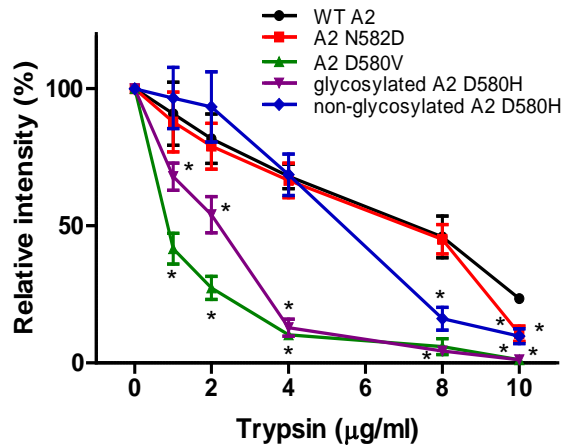

**Figure S3. Protease digestion of WT and mutant FVIII A2 domain at 37 °C.** (A) COS1 cells were suspended in phosphate buffered saline and lysed by passing through a ball bearing homogenizer with 18 micron clearance (Isobiotec, Heidelberg, Germany) 36 h after transfection with the WT A2, A2-N582D, A2-D580H or A2-D580V plasmids. After removing debris by centrifugation (15,000 g, 10 min, 4 °C), 10 µg protein was subject to digestion by various concentrations of trypsin (0-10 µg/ml) in 15 µl reaction volume at 37 °C for 15 minutes. (B) The relative protein levels were quantified and plotted as percentages remaining (data are mean ± SEM, n=3. \* $P < 0.05$ ).
